# Supplementary material for: The Flare of Rheumatic Disease After SARS-CoV-2 Vaccination: A Review
Source: PubMed Central journal article supplement (PMC9289284; doi:10.3389/fimmu.2022.919979), 2022-07-04
Supplement: Image_1.pdf [file Image_1.pdf]

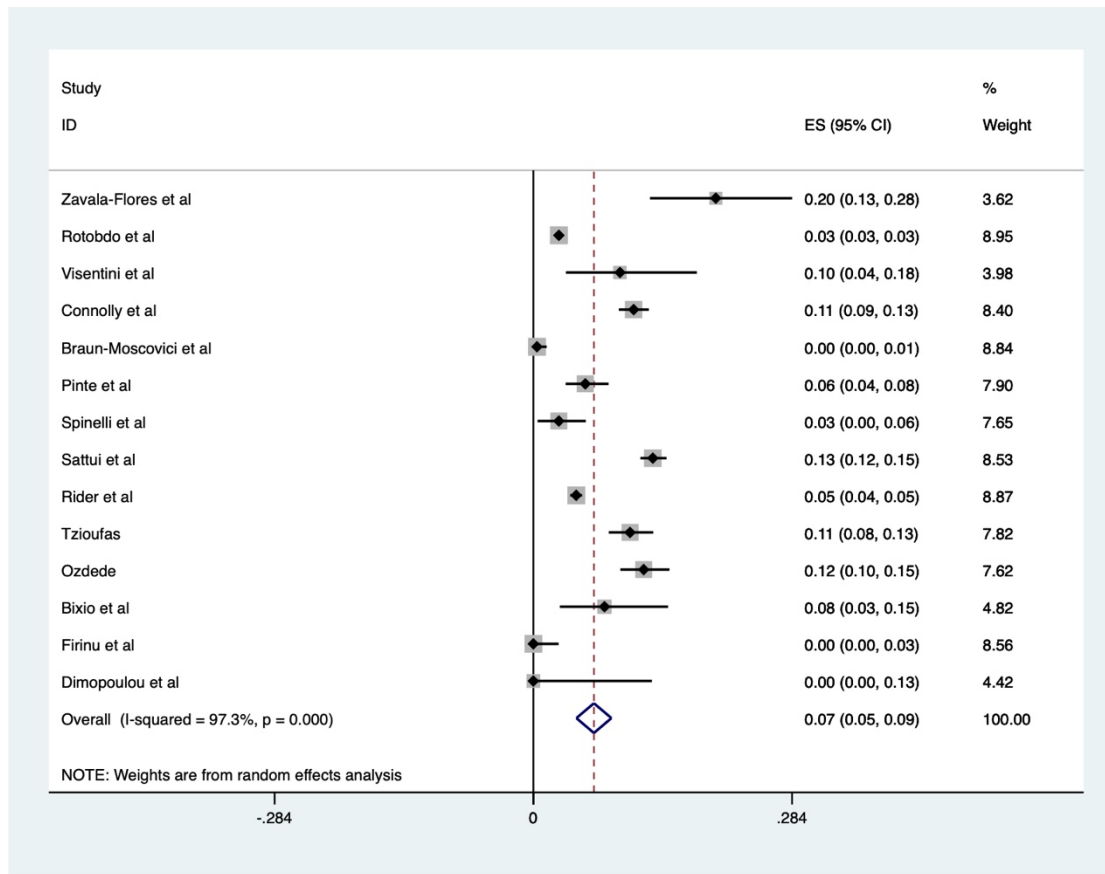

**Supplementary Figure 1.** Flare rate of rheumatic disease after mRNA COVID-19 vaccination.
